# Supplementary material
Source: publisher figshare collection journal article supplement (https://acs.figshare.com/ndownloader/files/4729909)
Supplement: Supplementary file 1 [file 4729909]

Special notice:

This kind lacklustre pearls were just found in freshwater cultured pearls in south China. But we think this phenomenon is prevalent in diversiform freshwater pearls at other places. However, it not occurred in nacre of organism shell due to the less influence of environment in body. The vaterite layers has the lower rigidity than nacre, and the lower solubility in water than nacre.
